# Supplementary material for: Concussion in youth rugby union and rugby league: a systematic review
Source: HighWire-hosted journal article supplement (doi:10.1136/bjsports-2014-093774), 2015-01-13

## Supplementary Figure

Concussion in youth rugby union and rugby league – a systematic review. Kirkwood et al

Figure one. Flow diagram for study selection

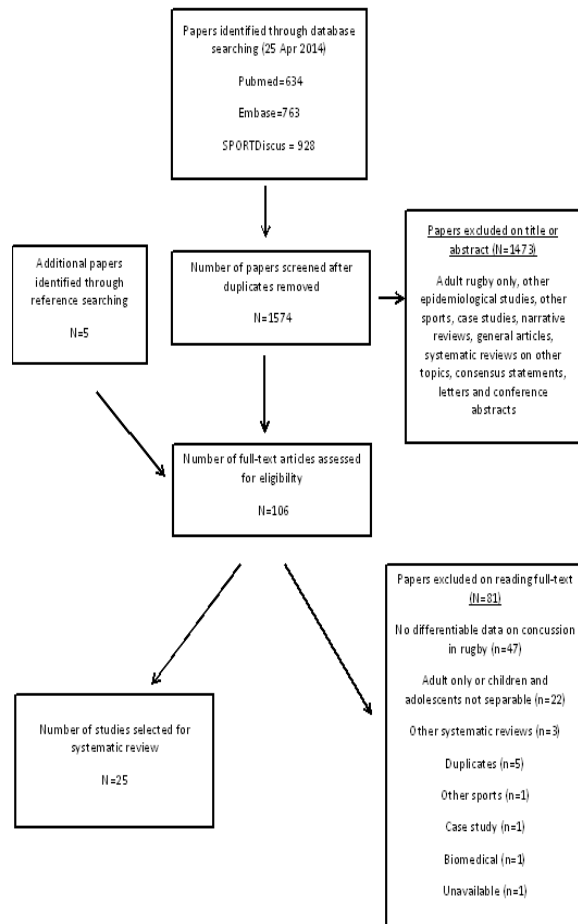

Supplement: bjsports-2014-093774supp_figure.pdf [file bjsports-2014-093774supp_figure.pdf]
